# Supplementary material for: A novel chemiluminescence sensor for sensitive detection of cholesterol based on the peroxidase-like activity of copper nanoclusters
Source: PubMed Central journal article supplement (PMC5155213; doi:10.1038/srep39157), 2016-12-14
Supplement: srep39157-s1.pdf [file srep39157-s1.pdf]

**A novel chemiluminescence sensor for sensitive detection of  
cholesterol based on the peroxidase-like activity of copper  
nanoclusters**

Shuangjiao Xu<sup>†</sup>, Yanqin Wang<sup>†</sup>, Dayun Zhou, Meng Kuang, Dan Fang, Weihua Yang,  
Shoujun Wei\*, Lei Ma\*

State Key Laboratory of Cotton Biology, Institute of Cotton Research of CAAS,  
Anyang 455000, China

<sup>†</sup> These authors contributed equally to this work.

**\*Corresponding Author**

Lei Ma, Ph.D, Email: malei2002@163.com, Phone: 86-372-2562278,

Fax numbers: 86-372-2562278

**\*Co-corresponding Author:**

Shoujun Wei, Email: 13503728390@163.com

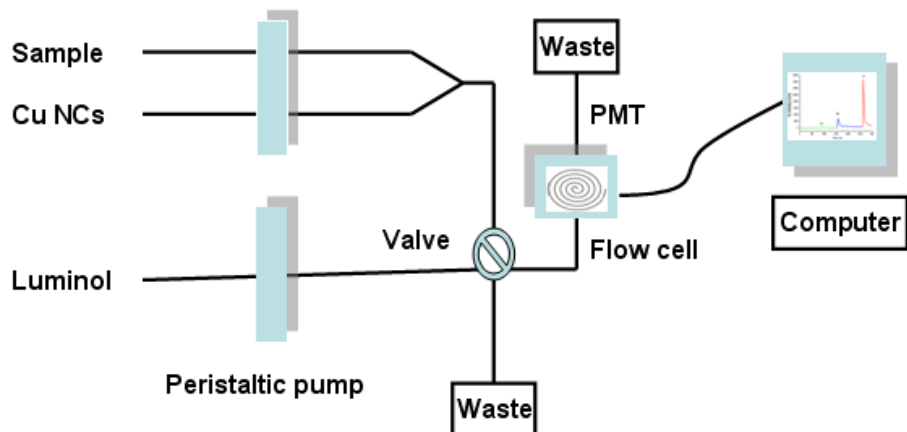

Figure S1. Schematic diagram of the flow injection CL sensing system.

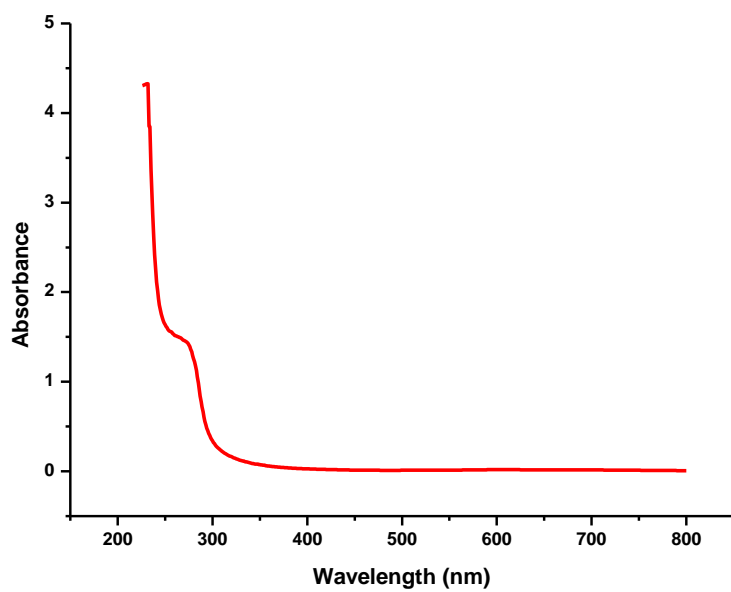

Figure S2. The UV-vis spectra of as-prepared Cu NCs.

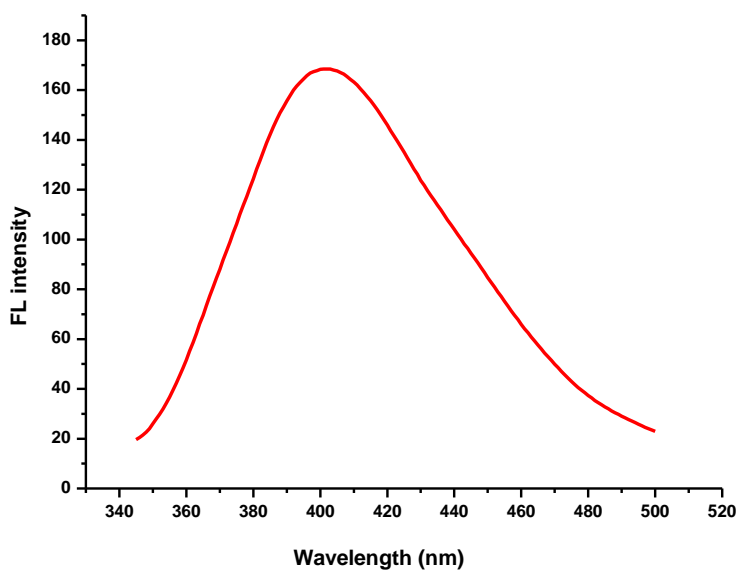

Figure S3. The fluorescence emission spectra of as-prepared Cu NCs (Ex=325nm).

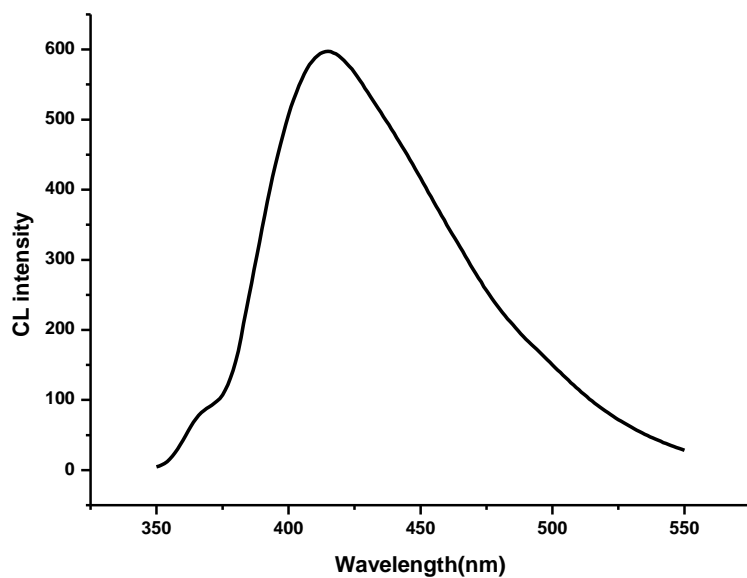

Figure S4. Chemiluminescence spectrum for the luminol-cholesterol/ChOx-Cu NCs CL system.
